# Supplementary material for: Distance estimation by Asian honey bees in two visually different landscapes
Source: Oxford University Press journal article supplement (doi:10.1242/jeb.242404), 2021-04-01
Supplement: jeb242404supp.pdf [file jeb242404supp.pdf]

## Supplementary Tables

**Table S1**

| Species            | Condition         | Distance | Dances |
|--------------------|-------------------|----------|--------|
| <i>Apis florea</i> | Dense vegetation  | 100m     | 8      |
|                    |                   | 200m     | 5      |
|                    |                   | 300m     | 7      |
|                    |                   | 400m     | 4      |
|                    |                   | 500m     | 10     |
|                    | Sparse vegetation | 100m     | 10     |
|                    |                   | 200m     | 6      |
|                    |                   | 300m     | 6      |
|                    |                   | 400m     | 6      |
|                    |                   | 500m     | 8      |
| <i>Apis cerana</i> | Dense vegetation  | 100m     | 10     |
|                    |                   | 200m     | 10     |
|                    |                   | 300m     | 10     |
|                    |                   | 400m     | 10     |
|                    |                   | 500m     | 10     |
|                    | Sparse vegetation | 100m     | 10     |
|                    |                   | 200m     | 10     |
|                    |                   | 300m     | 10     |
|                    |                   | 400m     | 10     |
|                    |                   | 500m     | 10     |

List of dances analysed for each distance for both conditions in both species

**Table S2**

| Species          | Parameter | Sparse                            |                  |                                 |                  | Dense                            |              |                                |              |
|------------------|-----------|-----------------------------------|------------------|---------------------------------|------------------|----------------------------------|--------------|--------------------------------|--------------|
|                  |           | Intercept                         |                  | Slope                           |                  | Intercept                        |              | Slope                          |              |
|                  |           | Est<br>(t/z value)                | p                | Est<br>(t/z value)              | p                | Est<br>(t/z value)               | p            | Est<br>(t/z value)             | p            |
| <i>A. florea</i> | WP        | <b>-2.377</b><br><b>(-5.234)</b>  | <b>&lt;0.001</b> | <b>0.686</b><br><b>(8.816)</b>  | <b>&lt;0.001</b> | <b>-1.655</b><br><b>(-2.509)</b> | <b>0.015</b> | <b>0.349</b><br><b>(2.921)</b> | <b>0.005</b> |
|                  | RP        | -1.074<br>(-0.599)                | 0.551            | 0.592<br>(1.790)                | 0.079            | -3.769<br>(-1.449)               | 0.153        | 0.815<br>(1.730)               | 0.089        |
|                  | NC        | <b>2.628</b><br><b>(16.900)</b>   | <b>&lt;0.001</b> | -0.0007<br>(-1.443)             | 0.149            | -0.488<br>(-1.926)               | 0.054        | 0.0009<br>(1.165)              | 0.244        |
| <i>A. cerana</i> | WP        | <b>-4.191</b><br><b>(-11.558)</b> | <b>&lt;0.001</b> | <b>0.998</b><br><b>(13.988)</b> | <b>&lt;0.001</b> | 0.516<br>(1.006)                 | 0.318        | -0.135<br>(-1.336)             | 0.186        |
|                  | RP        | -0.101<br>(-0.099)                | 0.922            | <b>0.408</b><br><b>(2.227)</b>  | <b>0.029</b>     | -1.389<br>(-0.989)               | 0.326        | 0.292<br>(1.148)               | 0.255        |
|                  | NC        | <b>2.417</b><br><b>(14.146)</b>   | <b>&lt;0.001</b> | -0.0003<br>(-0.511)             | 0.609            | -0.168<br>(-0.673)               | 0.501        | 0.0001<br>(0.134)              | 0.893        |

Model summary of the mixed-effects models fit for each of the three dance parameters (WP: Waggle Phase duration; RP: Return Phase duration; NC: Number of Dance Circuits) in *A. florea* and *A. cerana*. The estimate (Est) as well as the associated t/z value (t for continuous parameters, z for discrete parameters) for the intercept and slope in both conditions are provided along with the associated p values. The models were implemented with the Sparse vegetation condition as the base contrast level, and hence the p value of the slope and the intercept in this case is associated with whether the estimate is different from zero. In the case of Dense vegetation condition, the estimate value represents the difference in the estimated value between the Dense and Sparse vegetation conditions, and the p value is associated with this difference. Significant differences at the  $p < 0.05$  level are highlighted in bold.

## Supplementary Figure

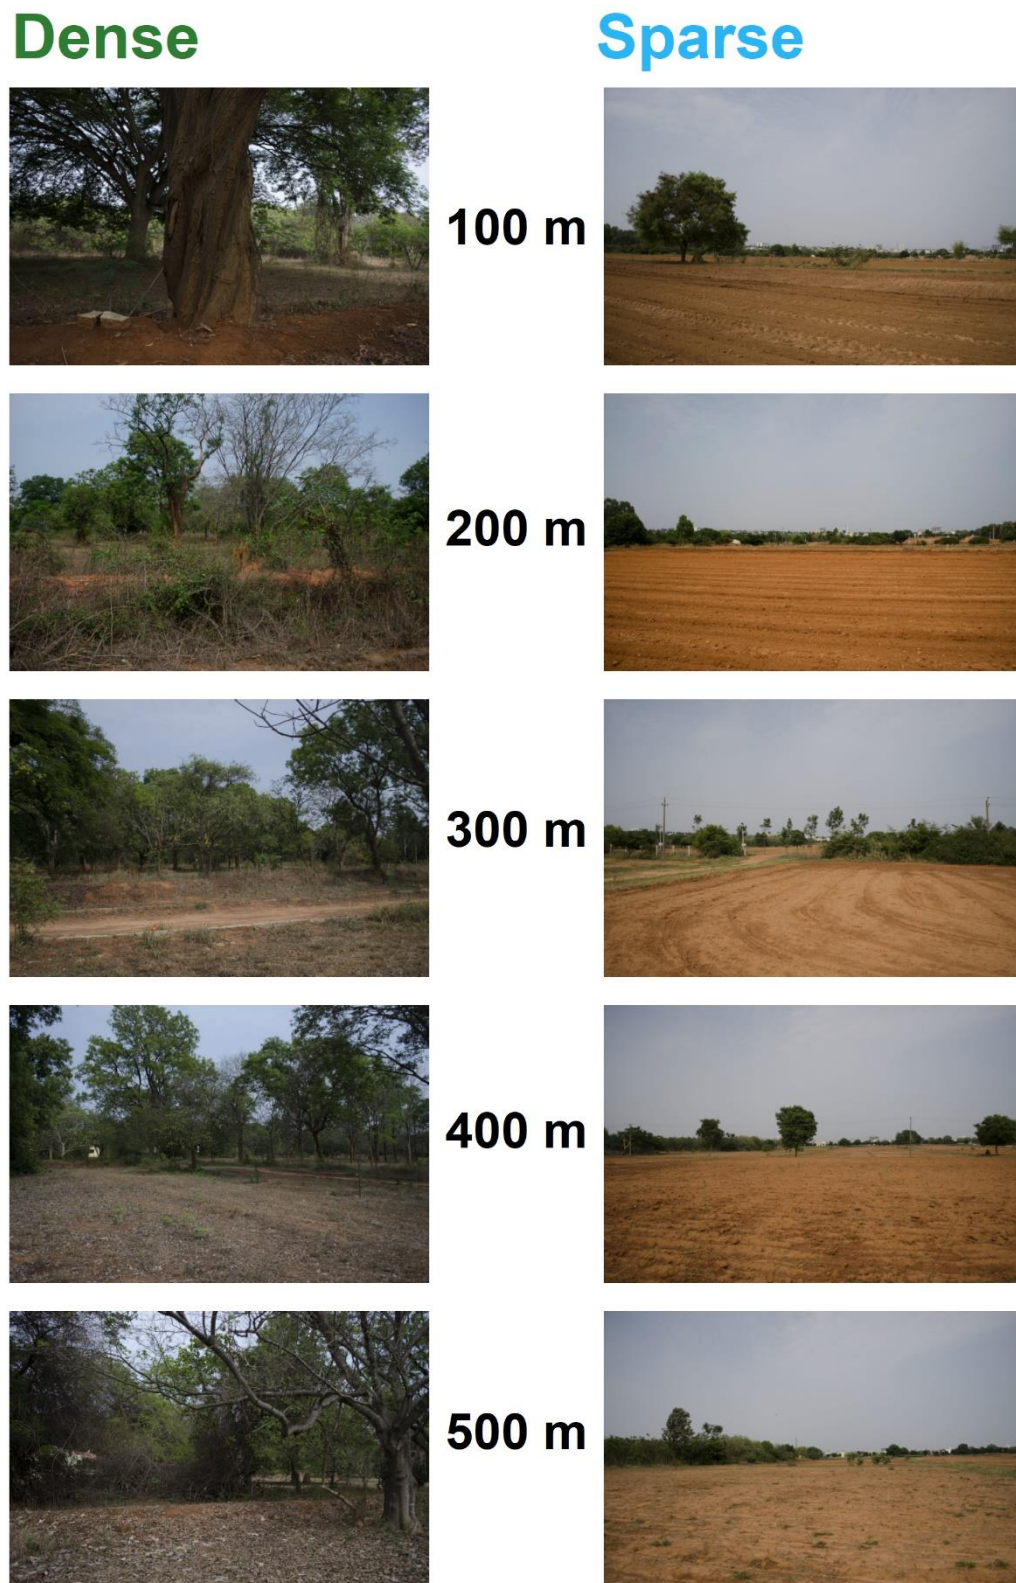

**Figure S1**

Photographs at every 100 m along the 500 m transect (facing in the direction of the hive) in both the vegetation conditions. These photographs were used to obtain the contrast values in Figure 1 in the manuscript.
